# Supplementary material
Source: Springer Nature journal article supplement (https://www.springermedizin.de/resource/supplementary/12986_2010_277_MOESM1_ESM.pdf/25655740)

**Capsinoid ingestion  
(0 mg or 10 mg)**

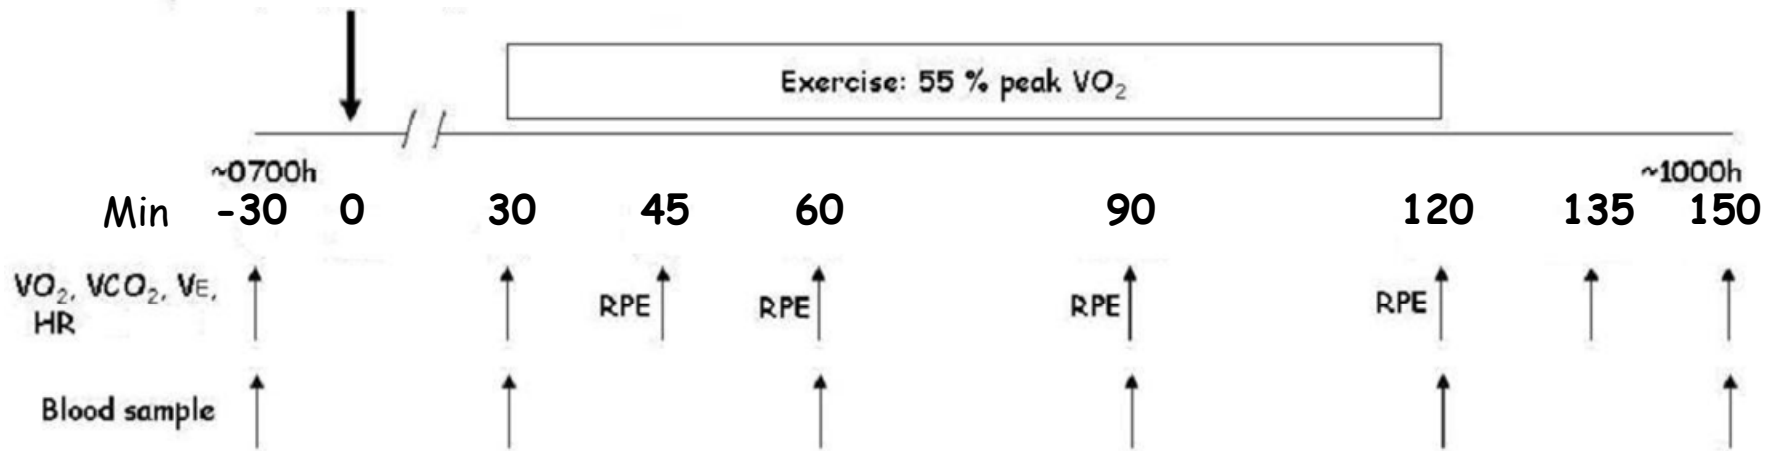

Supplement: MOESM1 [file 25655740]
